# Supplementary material
Source: MDPI journal article supplement (https://www.mdpi.com/2073-4441/13/13/1731)
Supplement: s1 [file s1]

# Prevalence of Antibiotic Resistance Genes in Pharmaceutical Wastewaters

Amarachukwu Obayiuwana <sup>1,\*</sup> Adeniyi Ogunjobi <sup>2</sup> and Abasiofiok Ibekwe <sup>3</sup>

<sup>1</sup> Department of Biological Sciences, Augustine University Ilara-Epe, Lagos State 106101, Nigeria

<sup>2</sup> Department of Microbiology, University of Ibadan, Ibadan 200284, Nigeria; aa.ogunjobi@mail.ui.edu.ng

<sup>3</sup> U.S. Salinity Laboratory, USDA-ARS, 450 West Big Springs Road, Riverside, CA 92507, USA; mark.ibekwe@ARS.USDA.GOV

\* Correspondence: amarachukwu.obayiuwana@augustineuniversity.edu.ng; Tel.: +234-803-789-2528

## Supplementary

**Table S1: Description of sites and sources of metagenomic DNA of Pharmaceutical wastewater**

| Environmental Samples | Sites                           | Source Description      | No of composite samples taken |
|-----------------------|---------------------------------|-------------------------|-------------------------------|
| PFI                   | Pharmaceutical Production Plant | IFD & Holding tanks     | 8                             |
| PFII                  | Pharmaceutical Production Plant | IFD & Holding tanks     | 8                             |
| PFIII                 | Pharmaceutical Production Plant | IFD & Holding tanks     | 8                             |
| PFIV                  | Pharmaceutical Production Plant | Public drainage outlets | 8                             |

PFI-IV – Pharmaceutical Facilities I to IV; IFD – Internal Facility Drainages. The untreated wastewater samples were taken from different points within the production facilities.

**Table S2: Primers and conditions used to amplify tetracycline resistance genes by the PCR techniques**

| Target Gene    | Primer | Sequence (5'-3')      | Amplicon size (bp) | Annealing temp. (°C) | Reference                      |
|----------------|--------|-----------------------|--------------------|----------------------|--------------------------------|
| <i>tet</i> (A) | tetA-F | GCTACATCCTGCTTGCCTTC  | 210                | 55                   | Ng, L. K. <i>et al.</i> , 2001 |
|                | tetA-R | CATAGATCGCCGTGAAGAGG  |                    |                      |                                |
| <i>tet</i> (B) | tetB-F | TACGTGAATTTATTGCTTCGG | 206                | 55                   | Ng, L. K. <i>et al.</i> , 2001 |
|                | tetB-R | ATACAGCATCCAAAGCGCAC  |                    |                      |                                |
| <i>tet</i> (C) | tetC-F | CTTGAGAGCCTTCAACCCAG  | 418                | 55                   | Ng, L. K. <i>et al.</i> , 2001 |
|                | tetC-R | ATGGTCGTCTACCTGCC     |                    |                      |                                |
| <i>tet</i> (D) | tetD-F | GGAATATCTCCCGGAAGCGG  | 187                | 68                   | Aminov <i>et al.</i> , 2002    |
|                | tetD-R | GGAATATCTCCCGGAAGCGG  |                    |                      |                                |
| <i>tet</i> (E) | tetE-F | AAACCACATCCTCCATACGC  | 278                | 55                   | Ng, L. K. <i>et al.</i> , 2001 |
|                | tetE-R | AAATAGGCCACAACCGTCAG  |                    |                      |                                |
| <i>tet</i> (G) | tetG-F | GCTCGGTGGTATCTCTGCTC  | 468                | 60                   | Ng, L. K. <i>et al.</i> , 2001 |
|                | tetG-R | AGCAACAGAATCGGGAACAC  |                    |                      |                                |
| <i>tet</i> (J) | tetJ-F | CGAAAACAGACTCGCCAATC  | 184                | 61                   | Aminov <i>et al.</i> , 2002    |
|                | tetJ-R | TCCATAATGAGGTGGGGC    |                    |                      |                                |
| <i>tet</i> (Y) | tetY-F | ATTGTACCGGCAGAGCAAAC  | 181                | 68                   | Aminov <i>et al.</i> , 2002    |
|                | tetY-R | GGCGCTGCCGCCATTATGC   |                    |                      |                                |
| <i>tet</i> (Z) | tetZ-F | CCTTCTCGACCAGGTCGG    | 204                | 61                   | Aminov <i>et al.</i> , 2002    |
|                | tetZ-R | ACCCACAGCGTGTCCGTC    |                    |                      |                                |
| <i>tet</i> (M) | tetM-F | ACAGAAAGCTTATTATATAAC | 171                | 55                   | Aminov <i>et al.</i> , 2001    |
|                | tetM-R | TGGCGTGTCTATGATGTTAC  |                    |                      |                                |
| <i>tet</i> (O) | tetO-F | AACTTAGGCATTCTGGCTCAC | 515                | 55                   | Ng, L. K. <i>et al.</i> , 2001 |

|                 |         |                        |     |    |                                |
|-----------------|---------|------------------------|-----|----|--------------------------------|
|                 | tetO-R  | TCCCAGTGTCCATATCGTCA   |     |    |                                |
| <i>tet</i> (Q)  | tetQ-F  | AGAATCTGCTGTTTGCCAGTG  | 169 | 63 | Aminov <i>et al.</i> , 2001    |
|                 | tetQ-R  | CGGAGTGTCAATGATATTGCA  |     |    |                                |
| <i>tet</i> (T)  | tetT-F  | AAGGTTTATTATATAAAAAGTG | 169 | 46 | Aminov <i>et al.</i> , 2001    |
|                 | tetT-R  | AGGTGTATCTATGATATTTAC  |     |    |                                |
| <i>tet</i> (W)  | tetW-F  | GAGAGCCTGCTATATGCCAGC  | 168 | 64 | Aminov <i>et al.</i> , 2001    |
|                 | tetW-R  | GGGCGTATCCACAATGTTAAC  |     |    |                                |
| <i>tet</i> (X)  | tetX-F  | CAATAATTGGTGGTGGACCC   | 468 | 55 | Ng, L. K. <i>et al.</i> , 2001 |
|                 | tetX-R  | TTCTTACCTTGGACATCCCG   |     |    |                                |
| <i>tet</i> (BP) | tetBP-F | AAAACCTTATTATATTATAGTG | 169 | 46 | Aminov <i>et al.</i> , 2001    |
|                 | tetBP-R | TGGAGTATCAATAATATTCAC  |     |    |                                |

---

**Table S3: Primers and conditions used to amplify aminoglycosides resistance genes by PCR techniques**

| Target Gene                        | Primer                               | Sequence (5'-3')      | Amplicon<br>size (bp) | Annealing<br>temp. (°C) | Reference                        |
|------------------------------------|--------------------------------------|-----------------------|-----------------------|-------------------------|----------------------------------|
| <i>aac(3)</i> -IV                  | <i>aac(3)</i> -IV-F                  | TGCTGGTCCACAGCTCCTTC  | 653                   | 56                      | Heuer <i>et al.</i> , 2002       |
|                                    | <i>aac(3)</i> -IV-R                  | CGGATGCAGGAAGATCAA    |                       |                         |                                  |
| <i>aac(6')</i> -Ib( <i>aacA4</i> ) | <i>aac(6')</i> -Ib( <i>aacA4</i> )-F | TGACCTTGCGATGCTCTATG  | 509                   | -                       | Heuer <i>et al.</i> , 2002       |
|                                    | <i>aac(6')</i> -Ib( <i>aacA4</i> )-R | TTAGGCATCACTGCGTGTTTC |                       |                         |                                  |
| <i>aac(3)</i> -I                   | <i>aac(3)</i> -I-F                   | ACCTACTCCCAACATCAGCC  | 169                   | 60                      | Heuer <i>et al.</i> , 2002       |
|                                    | <i>aac(3)</i> -I-R                   | ATATAGATCTCACTACGCGC  |                       |                         |                                  |
| <i>aac(3)</i> -II                  | <i>aac(3)</i> -II-F                  | ACTGTGATGGGATACGCGTC  | 237                   | 60                      | Heuer <i>et al.</i> , 2002       |
|                                    | <i>aac(3)</i> -II-R                  | CTCCGTCAGCGTTTCAGCTA  |                       |                         |                                  |
| <i>aac(3)</i> -III                 | <i>aac(3)</i> -III-F                 | GAAGTACGCAGAAGAGA     | 491                   | 58                      | Heuer <i>et al.</i> , 2002       |
|                                    | <i>aac(3)</i> -III-R                 | ACATGGCAAGCTCTAGGA    |                       |                         |                                  |
| <i>aphA1(aph(3')-Ia)</i>           | <i>aphA1(aph(3')-Ia)-F</i>           | ATGGGCTCGCGATAATGTC   | 600                   | 58                      | Vakulenko and Mobashery,<br>2003 |
|                                    | <i>aphA1(aph(3')-Ia)-R</i>           | CTCACCGAGGCAGTTCCAT   |                       |                         |                                  |
| <i>aph(3'')-I (strA)</i>           | <i>aph(3'')-I (strA)-F</i>           | CCTGGTGATAACGGCAATTC  | 546                   | 55                      | Vakulenko and Mobashery,<br>2003 |
|                                    | <i>aph(3'')-I (strA)-R</i>           | CCAATCGCAGATAGAAGGC   |                       |                         |                                  |
| <i>aph(6)-Id (strB)</i>            | <i>aph(6)-Id (strB)-F</i>            | ATCGTCAAGGGATTGAAACC  | 509                   | 56                      | Vakulenko and Mobashery,<br>2003 |
|                                    | <i>aph(6)-Id (strB)-R</i>            | GGATCGTAGAACATATTGGC  |                       |                         |                                  |
| <i>aadA(ANT(3'')-Ia)</i>           | <i>aadA(ANT(3'')-Ia)-F</i>           | GTGGATGGCGGCCTGAAGCC  | 529                   | 68                      | Vakulenko and Mobashery,         |

|                                    |                                      |                      |     |    |                               |
|------------------------------------|--------------------------------------|----------------------|-----|----|-------------------------------|
|                                    |                                      |                      |     |    | 2003                          |
|                                    | <i>aadA</i> (ANT(3'')-Ia)-R          | AATGCCCAGTCGGCAGCG   |     |    |                               |
| <i>ant</i> (6)-I( <i>aadE</i> )    | <i>ant</i> (6)-I( <i>aadE</i> )-F    | ACTGGCTTAATCAATTTGGG | 577 | 58 | Vakulenko and Mobashery, 2003 |
|                                    | <i>ant</i> (6)-I( <i>aadE</i> )-R    | GCCTTTCCGCCACCTCACCG |     |    |                               |
| <i>aadB</i> ( <i>ant</i> (2'')-Ia) | <i>aadB</i> ( <i>ant</i> (2'')-Ia)-F | ATGGACACAACGCAGGTCAC | 534 | 59 | Vakulenko and Mobashery, 2003 |
|                                    | <i>aadB</i> ( <i>ant</i> (2'')-Ia)-R | TTAGGCCGCATATCGCGACC |     |    |                               |

**Table S4: Primers and conditions used to amplify  $\beta$ -Lactam resistance genes by PCR techniques**

| Target Gene       | Primer              | Sequence (5'-3')        | Amplicon<br>size (bp) | Annealing<br>temp. (°C) | Reference                      |
|-------------------|---------------------|-------------------------|-----------------------|-------------------------|--------------------------------|
| <i>bla</i> -TEM   | <i>bla</i> -TEM-F   | ATAAAATTCTTGAAGACGAAA   | 1076                  | 50                      | Mabilat and Goussard, 1993     |
|                   | <i>bla</i> -TEM-R   | GACAGTTACCAATGCTTAATCA  |                       |                         |                                |
| <i>bla</i> -NDM-1 | <i>bla</i> -NDM-1-F | GTAAACGACGGCCAG         | 1705                  | 55                      | Walsh <i>et al.</i> , 2011     |
|                   | <i>bla</i> -NDM-1-R | CAGGAAACAGCTATGAC       |                       |                         |                                |
| <i>bla</i> -OXA   | <i>bla</i> -OXA-F   | GTCTTTCGAGTACGGCATT     | 720                   | 55                      | Vahaboglu <i>et al.</i> , 1998 |
|                   | <i>bla</i> -OXA-R   | ATTTTCTTAGCGGCAACTTAC   |                       |                         |                                |
| <i>bla</i> -IMP   | <i>bla</i> -IMP-F   | CTACCGCAGCAGAGTCTTTG    | 587                   | 50                      | Senda <i>et al.</i> , 1996     |
|                   | <i>bla</i> -IMP-R   | AACCAGTTTTGCCTTACCAT    |                       |                         |                                |
| <i>bla</i> -CTX   | <i>bla</i> -CTX-F   | TTTGCGATGTGCAGTACCAGTAA | 544                   | 55                      | Edelstein <i>et al.</i> , 2003 |
|                   | <i>bla</i> -CTX-R   | CGATATCGTTGGTGGTGCCATA  |                       |                         |                                |

**Table S5: Primers and conditions used to amplify sulphonamide and chloramphenicol resistance genes by PCR technique**

| Target Gene  | Primer         | Sequence (5'-3')      | Amplicon size<br>(bp) | Annealing temp.<br>(°C) | Reference                      |      |            |
|--------------|----------------|-----------------------|-----------------------|-------------------------|--------------------------------|------|------------|
| <i>catA1</i> | <i>catA1-F</i> | CGCCTGATGAATGCTCATCCG | 750                   | 60                      | National<br>Denmark            | Food | Institute  |
|              | <i>catA1-R</i> | CCTGCCACTCATCGCAGTAC  |                       |                         |                                |      |            |
| <i>cmlA</i>  | <i>cmlA-F</i>  | TACTCGGATCCATGCTGGCC  | 578                   | 50                      | National<br>Denmark            | Food | Institute  |
|              | <i>cmlA-R</i>  | TCCTCGAAGAGCGCCATTGG  |                       |                         |                                |      |            |
| <i>sul1</i>  | <i>sul1-F</i>  | ATCGCAATAGTTGGCGAAGT  | 798                   | 55                      | National<br>Denmark            | Food | Institute, |
|              | <i>sul1-R</i>  | GCAAGGCGGAAACCCGCGCC  |                       |                         |                                |      |            |
| <i>sul2</i>  | <i>sul2-F</i>  | GCGCTCAAGGCAGATGGCATT | 284                   | 70                      | Aarestrup <i>et al.</i> , 2003 |      |            |
|              | <i>sul2-R</i>  | GCGTTTGATACCGGCACCCGT |                       |                         |                                |      |            |

**Table S6: Primers and conditions used to amplify some genetic elements by PCR technique**

| Target Gene       | Primer               | Sequence (5'-3')     | Amplicon<br>size (bp) | Annealing<br>temp. (°C) | Reference                      |
|-------------------|----------------------|----------------------|-----------------------|-------------------------|--------------------------------|
| <i>intI1</i>      | <i>intI1</i> -F      | CCTCCCGCACGATGATC    | 280                   | 55                      | Goldstein <i>et al.</i> , 2001 |
|                   | <i>intI1</i> -R      | TCCACGCATCGTCAGGC    |                       |                         |                                |
| <i>intI2</i>      | <i>intI2</i> -F      | TTATTGCTGGGATTAGGC   | 233                   | 50                      | Goldstein <i>et al.</i> , 2001 |
|                   | <i>intI2</i> -R      | ACGGCTACCCTCTGTTATC  |                       |                         |                                |
| <i>Tn916/1545</i> | <i>Tn916/1545</i> -F | CTCTATCCTACAGCGACAGC | 949                   | 55                      | Roberts <i>et al.</i> , 2001   |
|                   | <i>Tn916/1545</i> -R | ATATACGAGTTTGTGCTTGT |                       |                         |                                |

## REFERENCES

1. Ng, L.K.; Martin, I.; Alfa, M.; Mulvey, M. Multiplex PCR for the detection of tetracycline resistant genes. *Mol. Cell. Probes*. 2001, 15, 209-215.
2. Aminov, R.I.; Chee-Sanford, J.C.; Garrigues, N.; Teferedegne, B.; Krapac, I.J.; White, B.A.; Mackie, R.I. Development, validation, and application of PCR primers for detection of tetracycline efflux genes of gram-negative bacteria. *Appl. Environ. Microbiol.* 2002, 68, 1786-1793.
3. Aminov, R.I.; Garrigues-Jeanjean, N.; Mackie, R.I. Molecular ecology of tetracycline resistance: Development and validation of primers for detection of tetracycline resistance gene encoding ribosomal protection proteins. *Appl. Environ. Microbiol.* 2001, 67, 22-32.
4. Heuer, H.; Krögerrecklenfort, E.; Wellington, E.M.H.; Egan, S.; van Elsas, J.D.; van Overbeek, L.; Collard, J.M.; Guillaume, G.; Karagouni, A.D.; Nikolakopoulou, T.L.; Smalla, K. Gentamicin resistance genes in environmental bacteria: prevalence and transfer. *FEMS Microbiol. Ecol.* 2002, 42, 289-302.

5. Vakulenko, S.B.; Mobashery, S. Versatility of aminoglycosides and prospects for their future. *Clin. Microbiol. Rev.* 2003, 16, 430-450.
6. Mabilat, C.; Goussard, S. PCR detection and identification of genes for extended-spectrum  $\beta$ -lactamases. In *Diagnostic Molecular Microbiology: Principles and Applications*. Persing, D.H., Smith, T.F., Tenover, F.C. and White, T.J. (eds). Washington, DC: ASM. 1993, 553-563.
7. Walsh, T.R.; Weeks, J.; Livermore, D.M.; Toleman, M.A. Dissemination of NDM-1 positive bacteria in the New Delhi environment and its implications for human health: an environmental point prevalence study. *Lancet Infect Dis.* 2011, 11, 355-362.
8. Vahaboglu, H.; Ozturk, R.; Akbal, H.; Saribas, S.; Tansel, O.; Kunkan, F.C. Practical approach for detection and identification of OXA-10-derived ceftazidimehydrolyzing extended-spectrum b-lactamases. *J. Clin. Microbiol.* 1998, 36, 827-829.
9. Senda, K.; Arakawa, Y.; Ichiyama, S.; Nakashima, K.; Ito, H.; Ohsuka, S.; Shimokata, K.; Kato, N.; Ohta, M. PCR detection of metallo- $\beta$ -lactamase gene (bla IMP) in Gram-negative rods resistant to broad-spectrum  $\beta$ -lactams. *J. Clin. Microbiol.* 1996, 34, 2909-2913.
10. Edelstein, M.; Pimkin, M.; Palagin, I.; Edelstein, I.; Stratchounski, L. Prevalence and molecular epidemiology of CTX-M extended-spectrum b-lactamase producing *Escherichia coli* and *Klebsiella pneumoniae* in Russian hospitals. *Antimicrob. Agents Chemother.* 2003, 47, 3724-3732.
11. Aarestrup, F.M.; Lertworapreecha, M.; Evans, M.C.; et al. Antimicrobial susceptibility and occurrence of resistance genes among *Salmonella enterica* serovar Weltevreden from different countries. *J. Antimicrob. Chemother.* 2003, 52, 715-718.
12. Goldstein, C.; Lee, M.D.; Sanchez, S.; Hudson, C.; Phillips, B.; Register, B.; Grady, M.; Liebert, C.; Summers, A.O.; White, D.G. Incidence of class 1 and 2 integrases in clinical and commensal bacteria from livestock, companion animals, and exotics. *Antimicrob. Agents Chemother.* 2001, 45, 723-726.
13. Roberts, A.P.; Cheah, G.; Ready, D.; Pratten, J.; Wilson, M.; Mullany, P. Transfer of Tn916-like elements in microcosm dental plaques. *Antimicrob. Agents Chemother.* 2001, 45, 2943-2946.
